# Supplementary material for: Comparative genomics shows that viral integrations are abundant and express piRNAs in the arboviral vectors Aedes aegypti and Aedes albopictus
Source: PubMed Central journal article supplement (PMC5497376; doi:10.1186/s12864-017-3903-3), 2017-07-05
Supplement: 12864_2017_3903_MOESM8_ESM.pdf [file 12864_2017_3903_MOESM8_ESM.pdf]

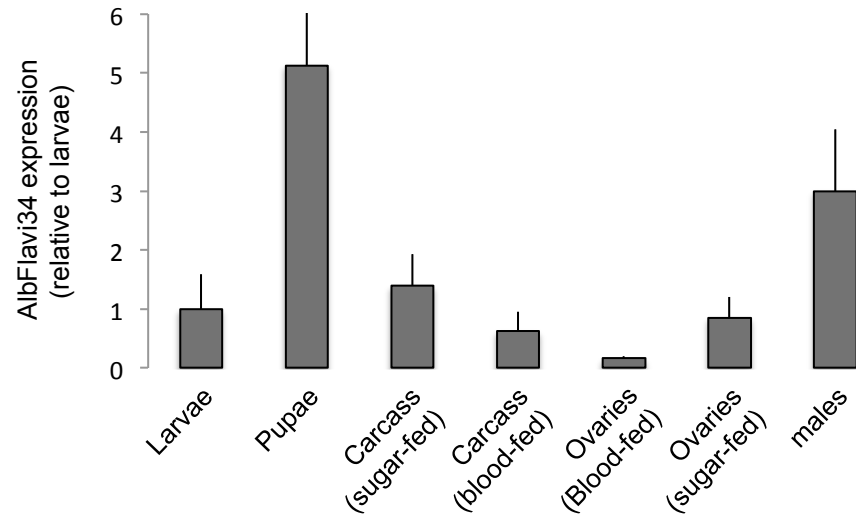

**Additional File 8: Figure S1. qRT-based expression of AlbFlavi34 in different developmental stages of *Ae. albopictus***
