# Supplementary material for: Comparative genomics shows that viral integrations are abundant and express piRNAs in the arboviral vectors Aedes aegypti and Aedes albopictus
Source: BMC Genomics. 2017 Jul 5;18:512. doi: 10.1186/s12864-017-3903-3 (PMC5497376; doi:10.1186/s12864-017-3903-3)
Supplement: Supplementary file 7 — (A) piRNA coverage at NIRVS loci. (B) NIRVS transcriptional activity. (XLSX 90 kb) [file 12864_2017_3903_MOESM7_ESM.xlsx]

## Sheet: Aegypti
Supplemental Table S6. NIRVS express piRNA. piRNA coverage at NIRVS loci (A) and NIRVS transcriptional activity (B).
A. piRNA coverage at NIRVS loci
				reads				normalized read count				log2 transformed normalized read count
Groups	Representative NIRVS	Corresponding viral ORF	Genomic context	female methoprene treated	female acetone treated	male		female methoprene treated	female acetone treated	male		female methoprene treated	female acetone treated	male
Unique	AeFlavi4A	E	PIRC2	894	1065	789		130.031	165.154	149.105		7.02272	7.36767	7.22018
Unique	AeFlavi34B	NS1	PIRC5	259	100	84		37.6713	15.5074	15.8743		5.23539	3.95489	3.98862
Unique	AeFlavi50	NS3-NS4	PIRC3	250	82	164		36.3623	12.7161	30.9926		5.18437	3.66858	4.95385
Unique	AeFlavi32	NS5	PIRC5	74	53	41		10.7632	8.21894	7.74816		3.42804	3.03895	2.95385
Unique	AeFlavi81	NS5	PIRC3	6	2	9		0.872695	0.310149	1.70082		-0.196451	-1.68897	0.766226
Unique	AeFlavi31	NS5	coding sequence	315	140	27		45.8165	21.7104	5.10245		5.51779	4.44032	2.35119
Unique	AeFlavi10	NS5	PIRC13	6	0	0		0.872695	0	0		-0.196451	#NUM!	#NUM!
Unique	AeFlavi83	NS5	PIRC9	176	120	602		25.599	18.6089	113.766		4.67802	4.21792	6.82992
Unique	AeFlavi34A	E	PIRC5	172	136	97		25.0172	21.0901	18.331		4.64485	4.39849	4.19621
Unique	AeFlavi4B	PrM	PIRC2	25	16	27		3.63623	2.48119	5.10245		1.86244	1.31103	2.35119
Unique	AeFlavi41	polyprotein	intergenic	0	1	0		0	0.155074	0		#NUM!	-2.68897	#NUM!
F-NIRV G2	AeFlavi53	NS1	PIRC3	1566	635	1817		227.773	98.4722	343.376		7.83145	6.62164	8.42364
F-NIRV G3	AeFlavi95B	NS1	intergenic	358	175	1665		52.0708	27.138	314.651		5.7024	4.76224	8.29761
F-NIRV G4	AeFlavi1286	NS3	PIRC3	4661	2424	4745		677.938	375.9	896.708		9.40501	8.55421	9.80849
Unique	AeRha15	G	intergenic	4	2	0		0.581796	0.310149	0		-0.781414	-1.68897	#NUM!
Unique	AeRha146	L	coding sequence	52	32	32		7.56335	4.96238	6.04734		2.91903	2.31103	2.5963
Unique	AeRha127	L	coding sequence	101	57	62		14.6904	8.83924	11.7167		3.8768	3.14392	3.5505
Unique	AeRha118A	L	intergenic	0	3	0		0	0.465223	0		#NUM!	-1.10401	#NUM!
Unique	AeRha108	L	intergenic	3	5	1		0.436347	0.775372	0.188979		-1.19645	-0.36704	-2.4037
Unique	AeRha80	G	intergenic	59	35	18		8.5815	5.4276	3.40163		3.10123	2.44032	1.76623
Unique	AeRha142	G	PIRC1	111	82	62		16.1448	12.7161	11.7167		4.013	3.66858	3.5505		77.6316
Unique	AeRha117	N	intergenic	0	1	4		0	0.155074	0.755918		#NUM!	-2.68897	-0.403699
Unique	AeRha246	G	PIRC12	52	21	14		7.56335	3.25656	2.64571		2.91903	1.70335	1.40366
Unique	AeRha3	N	PRC2/coding sequence	177	91	29		25.7445	14.1118	5.4804		4.68619	3.81883	2.45428
Unique	AeRha38	L	intergenic	13	3	5		1.89084	0.465223	0.944897		0.919026	-1.10401	-0.0817705
Unique	AeRha118B	L	intergenic	0	0	1		0	0	0.188979		#NUM!	#NUM!	-2.4037
Unique	AeRha245	G	PIRC12	190	77	74		27.6353	11.9407	13.9845		4.78844	3.57782	3.80575
Unique	AeRha27	L	intergenic	0	0	0		0	0	0		#NUM!	#NUM!	#NUM!
Unique	AeRha133A	G	PIRC9	93	35	21		13.5268	5.4276	3.96857		3.75774	2.44032	1.98862
Unique	AeRha133B	G	PIRC9	27	42	5		3.92713	6.51312	0.944897		1.97347	2.70335	-0.0817705
Unique	AeRha116	N	intergenic	5	6	10		0.727245	0.930446	1.88979		-0.459486	-0.104005	0.91823
Unique	AeRha85	N	coding sequence	1	4	1		0.145449	0.620297	0.188979		-2.78141	-0.688968	-2.4037
Unique	AeRha137	N	coding sequence	9	18	20		1.30904	2.79134	3.77959		0.388511	1.48096	1.91823
Unique	AeRha6	N	PIRC2	191	108	9		27.7808	16.748	1.70082		4.79601	4.06592	0.766226
Unique	AeRha160	L	intergenic	0	2	1		0	0.310149	0.188979		#NUM!	-1.68897	-2.4037
Unique	AeRha105	L	intergenic	0	2	0		0	0.310149	0		#NUM!	-1.68897	#NUM!
Unique	AeRha13	N	PIRC2	25	11	69		3.63623	1.70582	13.0396		1.86244	0.770464	3.70483
Unique	AeRha2	N	PIRC2	703	387	182		0	0	0		#NUM!	#NUM!	#NUM!
Unique	AeRha47	N	PIRC29	24	14	22		102.251	60.0138	34.3943		6.67597	5.90722	5.1041
Unique	AeRha16	N	intergenic	161	42	37		3.49078	2.17104	4.15755		1.80355	1.11839	2.05573
Unique	AeRha104	N	intergenic	6	21	1		23.4173	6.51312	6.99224		4.5495	2.70335	2.80575
Unique	AeRha8	N	PIRC2	120	63	76		0.872695	3.25656	0.188979		-0.196451	1.70335	-2.4037
Unique	AeRha14	G	PIRC2	51	25	193		17.4539	9.76969	14.3624		4.12548	3.28831	3.84423
Unique	AeRha5	N	PIRC2	450	261	64		7.4179	3.87686	36.473		2.89101	1.95489	5.18876
Unique	AeRha136	G	PIRC9	21	10	12		65.4521	40.4744	12.0947		6.03237	5.33894	3.5963
Unique	AeRha58	N	PRC28/coding sequence	2	1	0		3.05443	1.55074	2.26775		1.6109	0.63296	1.18126
Unique	AeRha42	N	coding sequence	30	27	36		0.290898	0.155074	0		-1.78141	-2.68897	#NUM!
Unique	AeRha45	N	coding sequence	37	14	32		4.36347	4.18701	6.80326		2.12548	2.06592	2.76623
Unique	AeRha112	N	intergenic	45	13	15		5.38162	2.17104	6.04734		2.42804	1.11839	2.5963
Unique	AeRha153	N	intergenic	81	28	6		6.54521	2.01597	2.83469		2.71044	1.01147	1.50319
Unique	AeRha113	N	PIRC21	18	32	1		11.7814	4.34208	1.13388		3.55844	2.11839	0.181264
Unique	AeRha152	N	intergenic	21	4	9		2.61808	4.96238	0.188979		1.38851	2.31103	-2.4037
Unique	AeRha156	N	coding sequence	0	2	1		3.05443	0.620297	1.70082		1.6109	-0.688968	0.766226
Unique	AeRha36	N	coding sequence	80	45	45		0	0.310149	0.188979		#NUM!	-1.68897	-2.4037
Unique	AeRha157	N	coding sequence	1	2	1		11.6359	6.97835	8.50408		3.54051	2.80289	3.08815
R-NIRV G16A	AeRha28	G	PIRC5	10	5	4		0.145449	0.310149	0.188979		-2.78141	-1.68897	-2.4037
R-NIRV G16B	AeRha29	G	PIRC5	27	10	17		1.45449	0.775372	0.755918		0.540514	-0.36704	-0.403699
R-NIRV G2	AeRha91	G	PIRC3	321	189	152		3.92713	1.55074	3.21265		1.97347	0.63296	1.68376
R-NIRV G3	AeRha83	G	intergenic	34	16	13		46.6892	29.3091	28.7249		5.54502	4.87327	4.84423
R-NIRV G17	AeRha139	G	PIRC1/PIRC7	196	90	257		4.94527	2.48119	2.45673		2.30605	1.31103	1.29674
R-NIRV G5	AeRha132	N	PIRC9	1667	761	780		28.508	13.9567	48.5677		4.8333	3.80289	5.60193
R-NIRV G4	AeRha51	N	coding sequence	66	14	11		242.464	118.012	147.404		7.92162	6.88278	7.20363
R-NIRV G6	AeRha154	N	coding sequence	34	28	12		9.59964	2.17104	2.07877		3.26298	1.11839	1.05573
R-NIRV G7	AeRha125	N	PIRC18/coding sequence	63	25	29		4.94527	4.34208	2.26775		2.30605	2.11839	1.18126
R-NIRV G8	AeRha33	G	intergenic	1557	557	590		9.16329	3.87686	5.4804		3.19587	1.95489	2.45428
R-NIRV G9	AeRha100	N	intergenic	997	700	256		226.464	86.3764	111.498		7.82314	6.43257	6.80087
R-NIRV G10	AeRha111	N	intergenic	63	25	17		145.013	108.552	48.3787		7.18004	6.76224	5.5963
Unique	AeRha75B	G	PIRC5	147	48	99		9.16329	3.87686	3.21265		3.19587	1.95489	1.68376
R-NIRV G11	AeRha75A	G	PIRC5/PIRC12	110	43	46		21.381	7.44357	18.709		4.41826	2.89599	4.22566
Unique	AeRha77A	G	PIRC12	47	54	17		15.9994	6.6682	8.69306		3.99995	2.7373	3.11986
R-NIRV G12	AeRha163	N	intergenic	530	300	93		6.83611	8.37402	3.21265		2.77317	3.06592	1.68376
R-NIRV G15	AeRha61	N	coding sequence	663	402	351		77.088	46.5223	17.5751		6.26843	5.53985	4.13546
R-NIRV G14	AeRha144	N	coding sequence	197	70	56		96.4327	62.3399	66.3318		6.59145	5.96208	6.05163
R-NIRV G13	AeRha57	N	coding sequence/intergenic	48	20	25		28.6535	10.8552	10.5829		4.84064	3.44032	3.40366
unique	AeBunya1	G	intergenic	0	0	0		6.98156	3.10149	4.72449		2.80355	1.63296	2.24016
unique	AeReo1	VP5	PIRC2	142	47	13		0	0	0		#NUM!	#NUM!	#NUM!
								20.6538	7.2885	2.45673
B. NIRV transcriptional activity. RNA-seq libraries analysed are shown in the next sheet.
				RPKM								Read Counts										Comparison Across Libraries, Pearson Correlation
				Chetumal blood				Liverpool		RexD		Chetumal blood				Liverpool		RexD				Chetumal Bloodfed vs Dengue-infected	0.927811
Groups	Representative NIRVS	Corresponding viral ORF	Genomic context	Blood-fed 1	DENV	Blood-fed 2	Sugar-fed	Blood-fed	sugar fed	Blood-fed	Sugar-fed	Blood-fed 1	DENV	Blood-fed 2	Sugar-fed	Blood-fed	sugar fed	Blood-fed	Sugar-fed			Chetumal Bloodfed vs Sugarfed	0.999333
Unique	AeFlavi4A	E	PIRC2	0.266877	0.066286	0.120508	0.111238	0.0833052	0.0937184	0.0957168	0.0837522	59	13	13	12	8	9	16	14			Liverpool Bloodfed vs Sugarfed	0.99858
Unique	AeFlavi34B	NS1	PIRC5	0.10974	0.0824695	0.0374824	0.0499766	0.0982458	0.0982458	0.112883	0.120946	18	12	3	4	7	7	14	15			RexD Bloodfed vs Sugarfed	0.999603
Unique	AeFlavi50	NS3-NS4	PIRC3	0.243459	0.117616	0.295285	0.244374	0.274514	0.320266	0.170849	0.183991	49	21	29	24	24	28	26	28			Sugarfed: Liverpool vs Chetumal	0.902737
Unique	AeFlavi32	NS5	PIRC5	0.110852	0.057673	0.157274	0.139799	0.314083	0.314083	0.0676647	0.0676647	13	6	9	8	16	16	6	6			Sugarfed: Liverpool vs RexD	0.748039
Unique	AeFlavi81	NS5	PIRC3	0.360575	0.158067	0.246313	0.246313	0.922308	0.922308	0.397396	0.450382	18	7	6	6	20	20	15	17			Sugarfed:RexD vs Chetumal	0.846655
Unique	AeFlavi31	NS5	coding sequence	1.65126	0.81928	1.57047	1.66395	4.06038	3.93437	1.30307	1.32721	543	239	252	267	580	562	324	330			Bloodfed: Liverpool vs Chetumal	0.900292
Unique	AeFlavi10	NS5	PIRC13	0	0	0.0340301	0	0	0	0	0	0	0	1	0	0	0	0	0			Bloodfed: Liverpool vs RexD	0.758453
Unique	AeFlavi83	NS5	PIRC9	0.789962	0.23891	0.789706	0.848934	0.443553	0.37702	0.305782	0.254819	82	22	40	43	20	17	24	20			Bloodfed:RexD vs Chetumal	0.848203
Unique	AeFlavi34A	E	PIRC5	0.151327	0.0354041	0.0643646	0.070216	0.0591571	0.0591571	0.139718	0.128389	53	11	11	12	9	9	37	34
Unique	AeFlavi4B	PrM	PIRC2	0.0934824	0.0843022	0.153262	0.134104	0	0	0.0370903	0.0370903	10	8	8	7	0	0	3	3
Unique	AeFlavi41	polyprotein	intergenic	0.88682	1.3457	0.978595	0.978595	0.471125	0.235562	2.07505	2.3006	26	35	14	14	6	3	46	51
F-NIRV G2	AeFlavi53	NS1	PIRC3	0.398295	0.297636	0.421877	0.394363	0.39149	0.39149	0.426143	0.479411	89	59	46	43	38	38	72	81
F-NIRV G3	AeFlavi95B	NS1	intergenic	0.107996	0.0521736	0.132792	0.120145	0.0923435	0.0923435	0.175476	0.167314	35	15	21	19	13	13	43	41
F-NIRV G4	AeFlavi1286	NS3	PIRC3	0.844128	0.379988	0.45103	0.45674	0.487418	0.471385	0.572934	0.580303	606	242	158	160	152	147	311	315
Unique	AeRha15	G	intergenic	0.304099	0.119978	0.498562	0.342761	0.490046	0.280026	0.100546	0.0402184	20	7	16	11	14	8	5	2
Unique	AeRha146	L	coding sequence	0	0	0	0	0	0	0	0	0	0	0	0	0	0	0	0
Unique	AeRha127	L	coding sequence	0	0	0	0	0	0	0	0	0	0	0	0	0	0	0	0
Unique	AeRha118A	L	intergenic	0	0	0	0	0	0	0	0	0	0	0	0	0	0	0	0
Unique	AeRha108	L	intergenic	0	0	0	0	0	0	0	0	0	0	0	0	0	0	0	0
Unique	AeRha80	G	intergenic	0.463124	0.24145	0.901642	0.913505	1.90575	2.05235	1.79922	1.61547	80	37	76	77	143	154	235	211
Unique	AeRha142	G	PIRC1	4.72446	2.00015	8.68727	8.88622	5.73605	5.87262	7.26826	7.24687	876	329	786	804	462	473	1019	1016
Unique	AeRha117	N	intergenic	0	0	0	0	0	0	0	0	0	0	0	0	0	0	0	0
Unique	AeRha246	G	PIRC12	0.32124	0.129327	0.329164	0.329164	0	0.158469	0.121386	0.121386	14	5	7	7	0	3	4	4
Unique	AeRha3	N	PRC2/coding sequence	0.0985947	0.111141	0.181848	0.161643	0.0907897	0.0680923	0.0782373	0.0782373	10	10	9	8	4	3	6	6
Unique	AeRha38	L	intergenic	0	0	0	0	0	0	0	0	0	0	0	0	0	0	0	0
Unique	AeRha118B	L	intergenic	0	0	0	0	0	0	0	0	0	0	0	0	0	0	0	0
Unique	AeRha245	G	PIRC12	0.132843	0.0598989	0.245017	0.190569	0.122327	0.152909	0.0878453	0.0878453	10	4	9	7	4	5	5	5
Unique	AeRha27	L	intergenic	0	0	0.0630802	0.0630802	0	0	0	0	0	0	1	1	0	0	0	0
Unique	AeRha133A	G	PIRC9	0.165719	0.100588	0.287365	0.287365	0.322808	0.234769	0.20231	0.252888	13	7	11	11	11	8	12	15
Unique	AeRha133B	G	PIRC9	0.249629	0.171963	0.312628	0.255787	0.287334	0.255408	0	0	18	11	11	9	9	8	0	0
Unique	AeRha116	N	intergenic	0	0	0	0	0	0	0	0	0	0	0	0	0	0	0	0
Unique	AeRha85	N	coding sequence	0	0	0	0	0	0	0	0	0	0	0	0	0	0	0	0
Unique	AeRha137	N	coding sequence	0	0	0.36947	0.328417	0	0	0.172205	0.238437	0	0	18	16	0	0	13	18
Unique	AeRha6	N	PIRC2	0.105903	0.0447671	0.0271289	0.0542578	0	0.0304749	0.0525229	0.0700306	8	3	1	2	0	1	3	4
Unique	AeRha160	L	intergenic	0	0	0	0	0	0	0	0	0	0	0	0	0	0	0	0
Unique	AeRha105	L	intergenic	0	0	0	0	0	0	0	0	0	0	0	0	0	0	0	0
Unique	AeRha13	N	PIRC2	0.198395	0.05591	0.575986	0.508222	0.0380603	0.152241	0.196789	0.196789	12	3	17	15	1	4	9	9
Unique	AeRha2	N	PIRC2	0.0852711	0.0768973	0.10485	0	0.117781	0.157042	0	0.0225549	5	4	3	0	3	4	0	1
Unique	AeRha47	N	PIRC29	0	0	0	0	0	0	0	0	0	0	0	0	0	0	0	0
Unique	AeRha16	N	intergenic	0.115384	0.0243874	0.0295576	0.0295576	0.0166015	0.0166015	0.0286125	0.0286125	16	3	2	2	1	1	3	3
Unique	AeRha104	N	intergenic	0	0	0	0	0	0	0	0	0	0	0	0	0	0	0	0
Unique	AeRha8	N	PIRC2	0.111824	0.0720304	0	0	0	0	0.0211274	0.0211274	7	4	0	0	0	0	1	1
Unique	AeRha14	G	PIRC2	0.476231	0.214732	0.68317	0.829564	0.548164	0.493348	0.472376	0.850277	20	8	14	17	10	9	15	27
Unique	AeRha5	N	PIRC2	0.0401915	0.0453057	0.31299	0.197678	1.40637	1.55441	0.0212619	0.0425239	5	5	19	12	76	84	2	4
Unique	AeRha136	G	PIRC9	0.0714347	0.107366	0.195192	0.292787	0.0548164	0.0548164	0.18895	0.125967	3	4	4	6	1	1	6	4
Unique	AeRha58	N	PRC28/coding sequence	0	0	0	0	0	0	0	0	0	0	0	0	0	0	0	0
Unique	AeRha42	N	coding sequence	0	0.0170032	0	0	0	0	0.00664965	0.00664965	0	3	0	0	0	0	1	1
Unique	AeRha45	N	coding sequence	0	0	0	0	0	0	0.00567708	0.00567708	0	0	0	0	0	0	1	1
Unique	AeRha112	N	intergenic	0	0	0	0	0	0	0	0	0	0	0	0	0	0	0	0
Unique	AeRha153	N	intergenic	0	0	0	0	0	0	0	0	0	0	0	0	0	0	0	0
Unique	AeRha113	N	PIRC21	0	0	0	0	0	0	0	0	0	0	0	0	0	0	0	0
Unique	AeRha152	N	intergenic	0	0	0	0	0	0	0	0	0	0	0	0	0	0	0	0
Unique	AeRha156	N	coding sequence	0	0	0	0	0	0	0	0	0	0	0	0	0	0	0	0
Unique	AeRha36	N	coding sequence	0	0	0	0	0	0	0	0	0	0	0	0	0	0	0	0
Unique	AeRha157	N	coding sequence	0	0	0	0	0	0	0	0	0	0	0	0	0	0	0	0
R-NIRV G16A	AeRha28	G	PIRC5	0.312379	0.0422554	0.332889	0.332889	0.28765	0.345181	0.330507	0.24788	25	3	13	13	10	12	20	15
R-NIRV G16B	AeRha29	G	PIRC5	0.194156	0.109431	0.312628	0.39789	0.31926	0.255408	0.128389	0.146731	14	7	11	14	10	8	7	8
R-NIRV G2	AeRha91	G	PIRC3	0.204651	0.11054	0.366973	0.410661	0.186487	0.196302	0.146607	0.140968	48	23	42	47	19	20	26	25
R-NIRV G3	AeRha83	G	intergenic	0.345757	0.0974383	0.0236191	0.0236191	0.30512	0.278588	1.09747	1.05936	60	15	2	2	23	21	144	139
R-NIRV G17	AeRha139	G	PIRC1/PIRC7	1.83833	0.934174	4.24151	4.42255	5.39412	5.52001	5.72488	5.70819	437	197	492	513	557	570	1029	1026
R-NIRV G5	AeRha132	N	PIRC9	2.71022	1.2749	2.69935	2.60042	1.92097	1.95272	2.21629	2.2619	393	164	191	184	121	123	243	248
R-NIRV G4	AeRha51	N	coding sequence	0	0.00392983	0	0.00714444	0	0	0	0	0	1	0	1	0	0	0	0
R-NIRV G6	AeRha154	N	coding sequence	0	0	0	0	0	0	0	0	0	0	0	0	0	0	0	0
R-NIRV G7	AeRha125	N	PIRC18/coding sequence	0.239347	0.0637717	0.0713459	0.0891823	0.150273	0.150273	0.305035	0.339568	55	13	8	10	15	15	53	59
R-NIRV G8	AeRha33	G	intergenic	0.23469	0.134773	0.508183	0.471884	0.316012	0.326206	0.140553	0.19326	53	27	56	52	31	32	24	33
R-NIRV G9	AeRha100	N	intergenic	1.09078	0.786362	1.0917	1.06571	0.832163	0.817563	0.3942	0.452911	172	110	84	82	57	56	47	54
R-NIRV G10	AeRha111	N	intergenic	0	0.00954765	0.0347153	0.0520729	0.0584954	0.0584954	0.0336053	0.0336053	0	1	2	3	3	3	3	3
Unique	AeRha75B	G	PIRC5	0.0760249	0.102839	0.0311601	0.12464	0.140013	0.0350033	0.0402184	0.0804367	5	6	1	4	4	1	2	4
R-NIRV G11	AeRha75A	G	PIRC5/PIRC12	0.120192	0.0903238	0.0410522	0.0410522	0	0.0461154	0.0794791	0.0794791	6	4	1	1	0	1	3	3
Unique	AeRha77A	G	PIRC12	0.0499807	0.0422554	0.0768204	0.0512136	0.0575301	0.0862951	0.0991522	0.132203	4	3	3	2	2	3	6	8
R-NIRV G12	AeRha163	N	intergenic	0.551877	0.544339	1.02287	1.17256	1.16771	1.121	1.36852	1.37926	136	119	123	141	125	120	255	257
R-NIRV G15	AeRha61	N	coding sequence	0.391262	0.371865	0.251554	0.235832	0.132459	0.14129	1.21248	1.17189	102	86	32	30	15	16	239	231
R-NIRV G14	AeRha144	N	coding sequence	1.75809	1.35102	6.2624	6.42505	4.27568	4.24827	17.0213	17.3362	443	302	770	790	468	465	3243	3303
R-NIRV G13	AeRha57	N	coding sequence/intergenic	0	0	0	0.0148637	0.016697	0.016697	0	0	0	0	0	1	1	1	0	0
unique	AeBunya1	G	intergenic	0.202545	0.102451	0.266079	0.212863	0.741262	0.74724	0.765845	0.738371	78	35	50	40	124	125	223	215
unique	AeReo1	VP5	PIRC2	0.390368	0.337566	0.317807	0.295889	0.0861733	0.0615523	0.205097	0.212169	73	56	29	27	7	5	29	30

## Sheet: Albopictus
Supplemental Table S7. A piRNAs coverage at NIRVS loci
				Reads			Normalised reads count			normalized log 2 transformed
				Male	Female		Male	Female		Male	Female
Groups	Representative NIRVS	Corresponding viral ORF	Genomic context	Sugar fed	Blood fed	Sugar fed	Sugar fed	Blood fed	Sugar fed	Sugar fed	Blood fed	Sugar fed
unique	AlbFlavi2	E	PIRC27	103	52	55	7.91397	4.25474	4.50569	2.9844	2.08907	2.17175
unique	AlbFlavi12_17C	E	PIRC263	54	23	9	4.14907	1.88191	0.737295	2.05279	0.912194	-0.439687
unique	AlbFlavi12_17D	NS5	PIRC263	12	3	3	0.922016	0.245466	0.245765	-0.117137	-2.02641	-2.02465
F-NIRVs G2	AlbFlavi8	NS1	intergenic	308	404	779	23.6651	33.0561	63.8169	4.56469	5.04684	5.99587
F-NIRVs G3	ALbFlavi37	NS3	PIRC281	224	75	136	17.211	6.13665	11.1413	4.10526	2.61745	3.47785
F-NIRVs G4	AlbFlavi18	NS2	PIRC281	147	83	205	11.2947	6.79122	16.7939	3.49757	2.76367	4.06987
F-NIRVs G5	AlbFlavi34	NS2	coding sequence	88	56	30	6.76145	4.58203	2.45765	2.75733	2.19599	1.29728
unique	AlbFlavi36A	NS4	intergenic	19	35	2	1.45986	2.86377	0.163843	0.545828	1.51792	-2.60961
unique	AlbFlavi12_17A	NS5	PIRC263	112	24	77	8.60548	1.96373	6.30796	3.10526	0.973595	2.65717
unique	AlbFlavi12_17B	NS5	PIRC263	20	11	4	1.53669	0.900042	0.327686	0.619829	-0.151936	-1.60961
unique	AlbFlavi36B	NS5	intergenic	91	35	3	6.99195	2.86377	0.245765	2.8057	1.51792	-2.02465
unique	AlbFlavi6	NS5	intergenic	164	87	33	12.6009	7.11851	2.70341	3.65545	2.83158	1.43478
unique	AlbFlavi7	NS5	intergenic	7	4	0	0.537843	0.327288	0	-0.894744	-1.61137	#NUM!
unique	AlbFlavi10	NS5	intergenic	34	11	5	2.61238	0.900042	0.409608	1.38536	-0.151936	-1.28768
unique	AlbFlavi38	NS5-DENV	intergenic	0	0	0	0	0	0	#NUM!	#NUM!	#NUM!
unique	AlbFlavi1	NS5	intergenic	27	13	15	2.07454	1.06369	1.22882	1.05279	0.0890717	0.297279
unique	AlbFlavi3	prM	PIRC27	56	18	20	4.30274	1.4728	1.63843	2.10526	0.558557	0.712316
unique	AlbFlavi4	C	coding sequence	166	60	81	12.7546	4.90932	6.63565	3.67294	2.29552	2.73024
F-NIRVs G6	AlbFlavi33	NS1	coding sequence	60	28	11	4.61008	2.29102	0.901138	2.20479	1.19599	-0.15018
unique	AlbFlavi39	polyprotein-DENV	intergenic	0	0	0	0	0	0	#NUM!	#NUM!	#NUM!
unique	AlbFlavi40	NS5-DENV	intergenic	0	0	0	0	0	0	#NUM!	#NUM!	#NUM!
unique	AlbRha79	L	intergenic	27	54	1	2.07454	4.41839	0.0819216	1.05279	2.14352	-3.60961
unique	AlbRha66	L	intergenic	29	21	4	2.2282	1.71826	0.327686	1.15588	0.780949	-1.60961
unique	AlbRha45	G	intergenic	0	0	0	0	0	0	#NUM!	#NUM!	#NUM!
unique	AlbRha49	G	intergenic	109	48	65	8.37498	3.92745	5.32491	3.06609	1.97359	2.41276
unique	AlbRha1	G	intergenic	207	104	49	15.9048	8.50948	4.01416	3.99139	3.08907	2.0051
unique	AlbRha7	G	intergenic	0	1	0	0	0.081822	0	#NUM!	-3.61137	#NUM!
unique	AlbRha88	L	intergenic	0	0	0	0	0	0	#NUM!	#NUM!	#NUM!
unique	AlbRha80	L	intergenic	61	65	8	4.68691	5.31843	0.655373	2.22864	2.411	-0.609612
unique	AlbRha2	L	intergenic	210	112	16	16.1353	9.16406	1.31075	4.01215	3.19599	0.390388
unique	AlbRha11	L	intergenic	19	9	2	1.45986	0.736398	0.163843	0.545828	-0.441443	-2.60961
unique	AlbRha74	L	intergenic	61	62	4	4.68691	5.07296	0.327686	2.22864	2.34283	-1.60961
unique	AlbRha38	L	intergenic	30	79	0	2.30504	6.46394	0	1.20479	2.69241	#NUM!
unique	AlbRha44	N	intergenic	0	0	0	0	0	0	#NUM!	#NUM!	#NUM!
unique	AlbRha36	N	PIR95	24	10	37	1.84403	0.81822	3.0311	0.882863	-0.28944	1.59984
unique	AlbRha42	L	intergenic	146	800	30	11.2179	65.4576	2.45765	3.48773	6.03249	1.29728
unique	AlbRha10	L	intergenic	24	10	0	1.84403	0.81822	0	0.882863	-0.28944	#NUM!
unique	AlbRha14	G	PIRC79	164	61	218	12.6009	4.99114	17.8589	3.65545	2.31937	4.15857
unique	AlbRha41	L	intergenic	96	207	12	7.37613	16.9371	0.983059	2.88286	4.08212	-0.0246495
unique	AlbRha4	L	intergenic	198	163	57	15.2133	13.337	4.66953	3.92726	3.73736	2.22328
unique	AlbRha84	L	intergenic	464	264	111	35.6513	21.601	9.0933	5.15588	4.43303	3.1848
unique	AlbRha73	L	intergenic	29	105	6	2.2282	8.59131	0.49153	1.15588	3.10288	-1.02465
unique	AlbRha52	L	coding sequence	2673	1206	247	205.379	98.6773	20.2346	7.68214	6.62465	4.33876
R-NIRVs G2	AlbRha94	N	intergenic	38	17	45	2.91972	1.39097	3.68647	1.54583	0.476095	1.88224
R-NIRVs G3	AlbRha48	N	/coding sequence	129	139	43	9.91167	11.3733	3.52263	3.30913	3.50757	1.81665
R-NIRVs G4	AlbRha95	G	intergenic	2	6	2	0.153669	0.490932	0.163843	-2.7021	-1.02641	-2.60961
unique	AlbRha3A_B	L	intergenic	52	50	12	3.9954	4.0911	0.983059	1.99834	2.03249	-0.0246495
R-NIRVs G5	AlbRha58	G	intergenic	47	25	103	3.61123	2.04555	8.43793	1.85249	1.03249	3.07689		79.2453
R-NIRVs G9	AlbRha43	G	coding sequence	19	18	25	1.45986	1.4728	2.04804	0.545828	0.558557	1.03424
R-NIRVs G6	AlbRha18	N	coding sequence	4	1	0	0.307339	0.081822	0	-1.7021	-3.61137	#NUM!
R-NIRVs G8	AlbRha12	N	coding sequence	1	0	0	0.0768346	0	0	-3.7021	#NUM!	#NUM!
unique	AlbRha85	L	coding sequence	586	662	60	45.0251	54.1661	4.9153	5.49266	5.75932	2.29728
R-NIRVs G7	AlbRha83	L	intergenic	884	819	320	67.9218	67.0122	26.2149	6.0858	6.06635	4.71232
B. NIRVS transcriptional activity. RNA-seq libraries analysed are shown in the next sheet.
					Control Carcasses		Control Midgut		DENV Carcasses		Denv Midgut
Groups	Representative NIRVs	Corresponding viral ORF	Genomic context	Sequence length	Reads	RPKM	Reads	RPKM	Reads	RPKM	Reads	RPKM
unique	AlbFlavi1	NS5	intergenic	228	27	0.53521	14	0.340724	14	0.505777	11	0.374492
unique	AlbFlavi2	E	PIRC27	938	3	0.0144549	1	0.00591571	2	0.0175628	0	0
unique	AlbFlavi3	prM	PIRC27	690	1	0.00655007	2	0.0160839	0	0	2	0.0224991
unique	AlbFlavi4	C	coding sequence	513	17	0.149771	37	0.400216	7	0.112395	19	0.287489
unique	AlbFlavi6	NS5	intergenic	1116	8	0.0323982	10	0.0497216	4	0.0295231	12	0.0834645
unique	AlbFlavi7	NS5	intergenic	228	3	0.0594678	1	0.0243374	2	0.0722539	3	0.102134
F-NIRVs G2	AlbFlavi8	NS1	intergenic	462	7	0.068478	6	0.0720641	1	0.0178289	7	0.117609
unique	AlbFlavi10	NS5	intergenic	1428	0	0	0	0	0	0	0	0
unique	AlbFlavi12_17A	NS5	PIRC263	495	40	0.365216	28	0.313879	6	0.0998417	14	0.219537
unique	AlbFlavi12_17B	NS5	PIRC263	165	12	0.328695	7	0.235409	6	0.299525	7	0.329305
unique	AlbFlavi12_17C	E	PIRC263	93	6	0.291584	6	0.357996	1	0.0885693	3	0.250394
unique	AlbFlavi12_17D	NS5	PIRC263	96	8	0.376629	8	0.462411	2	0.171603	6	0.485137
F-NIRVs G4	AlbFlavi18	NS2	PIRC281	1593	97	0.275202	252	0.877798	25	0.129268	171	0.83323
F-NIRVs G6	AlbFlavi33	NS1	coding sequence	1785	2	0.00506392	3	0.00932594	1	0.00461453	5	0.0217429
F-NIRVs G5	AlbFlavi34	NS2-NS3	coding sequence	2538	5	0.00890376	4	0.00874537	4	0.0129818	3	0.00917518
unique	AlbFlavi36A	NS4	intergenic	492	0	0	0	0	0	0	0	0
unique	AlbFlavi36B	NS5	intergenic	549	0	0	0	0	0	0	0	0
F-NIRVs G3	ALbFlavi37	NS3	PIRC281	948	12	0.0572095	25	0.146333	3	0.0260663	21	0.171947
unique	AlbFlavi38	NS5-DENV	intergenic	1461	0	0	0	0	0	0	0	0
unique	AlbFlavi39	polyprotein-DENV	intergenic	1959	0	0	0	0	0	0	0	0
unique	AlbFlavi40	NS5-DENV	intergenic	861	0	0	0	0	0	0	0	0
unique	AlbRha1	G	intergenic	897	4	0.0201541	3	0.0185583	2	0.0183655	5	0.0432676
unique	AlbRha2	L	intergenic	498	46	0.417469	0	0	42	0.694682	0	0
unique	AlbRha3A_B	L	intergenic	584	1	0.00773896	1	0.0095016	3	0.0423131	3	0.0398743
unique	AlbRha4	L	intergenic	903	0	0	0	0	0	0	0	0
unique	AlbRha7	G	intergenic	150	2	0.0602607	35	1.29475	2	0.109826	19	0.983212
unique	AlbRha10	L	intergenic	1836	0	0	0	0	0	0	0	0
unique	AlbRha11	L	intergenic	474	0	0	0	0	0	0	0	0
R-NIRVs G8	AlbRha12	N	coding sequence	1161	929	3.61642	1	0.00477944	604	4.2852	5	0.0334289
unique	AlbRha14	G	PIRC79	231	4	0.0782606	15	0.36032	4	0.142631	9	0.302423
R-NIRVs G6	AlbRha18	N	coding sequence	1162	5072	19.7273	9	0.042978	2742	19.4369	8	0.0534403
unique	AlbRha36	N	PIR95	138	5	0.163752	16	0.643355	3	0.179064	5	0.281239
unique	AlbRha38	L	intergenic	609	0	0	0	0	0	0	0	0
unique	AlbRha41	L	intergenic	324	0	0	0	0	0	0	0	0
unique	AlbRha42	L	intergenic	423	0	0	0	0	0	0	0	0
R-NIRVs G9	AlbRha43	G	coding sequence	231	68	1.33043	180	4.32385	35	1.24802	111	3.72989
unique	AlbRha44	N	intergenic	210	0	0	0	0	0	0	0	0
unique	AlbRha45	G	intergenic	222	0	0	1	0.0249952	0	0	0	0
R-NIRVs G3	AlbRha48	N	intergenic/coding sequence	504	11	0.098641	32	0.352313	3	0.0490294	20	0.308024
unique	AlbRha49	G	intergenic	840	5	0.0269021	15	0.0990881	0	0	13	0.120129
unique	AlbRha52	L	coding sequence	2610	1908	3.30395	87	0.184965	1468	4.63289	84	0.249818
R-NIRVs G5	AlbRha58	G	intergenic	831	305	1.6588	544	3.63252	186	1.84365	427	3.98852
unique	AlbRha66	L	intergenic	1047	1	0.00431667	0	0	0	0	0	0
unique	AlbRha73	L	intergenic	327	1	0.0138213	0	0	1	0.0251894	0	0
unique	AlbRha74	L	intergenic	1221	0	0	0	0	0	0	0	0
unique	AlbRha79	L	intergenic	477	0	0	0	0	0	0	0	0
unique	AlbRha80	L	intergenic	636	0	0	0	0	0	0	0	0
R-NIRVs G7	AlbRha83	L	intergenic	987	0	0	1	0.00562202	1	0.00834543	1	0.00786444
unique	AlbRha84	L	intergenic	420	0	0	0	0	0	0	0	0
unique	AlbRha85	L	coding sequence	630	99	0.710215	102	0.898399	44	0.575278	68	0.837825
unique	AlbRha88	L	intergenic	207	0	0	0	0	0	0	0	0
R-NIRVs G2	AlbRha94	N	intergenic	486	1	0.00929949	10	0.114176	1	0.0169484	5	0.079858
R-NIRVs G4	AlbRha95	G	intergenic	348	2	0.0259744	2	0.0318904	4	0.0946775	2	0.0446103

## Sheet: Library used
	ID	STUDY	Experiment description	RUNS
Aedes albopictus	SRA438038	SRP077936	Prefed (day 0) control carcass	SRR3877964, SRR3877965, SRR3877966
			Prefed (day 0) control midgut	SRR3877967, SRR3877968, SRR3877969
			day 1 control carcass	SRR3877970, SRR3877971, SRR3877972
			day 1 control midgut	SRR3877973, SRR3877974, SRR3877975
			day 1 DENV-fed carcass	SRR3877979, SRR3877980, SRR3877981
			day 1 DENV-fed midgut	SRR3877976, SRR3877977, SRR3877978
			day 5 control carcass	SRR3877982, SRR3877983, SRR3877984
			day 5 control midgut	SRR3877985, SRR3877986, SRR3877987
			day 5 DENV-fed carcass	SRR3877988, SRR3877989, SRR3877990
			day 5 DENV-fed midgut	SRR3877991, SRR3877992, SRR3877993
Aedes aegypti	SRA058076	SRP015697	Blood Fed	SRR567528
			Blood Fed	SRR567529
			Blood Fed	SRR567530
			Blood Fed	SRR567532
			Blood Fed	SRR567533
			Blood Fed	SRR567534
			Blood Fed	SRR567535
			DENV inf	SRR567540
			DENV inf	SRR567541
			DENV inf	SRR567542
			DENV inf	SRR567555
			DENV inf	SRR567556
			DENV inf	SRR575369
			DENV inf	SRR567558
	SRX253218	SRP019927	Sugar Fed Blood Fed	SRR789756_1 SRR789756_2
	SRX253219	SRP019927	Sugar Fed Blood Fed	SRR789757_1 SRR789757_2
	SRX253220	SRP019927	Sugar Fed Blood Fed	SRR789758_1 SRR789758_2
